# Supplementary material for: A computational modelling framework to quantify the effects of passaging cell lines
Source: PubMed Central journal article supplement (PMC5531485; doi:10.1371/journal.pone.0181941), 2017-07-27
Supplement: pone.0181941.s001.pdf [file pone.0181941.s001.pdf]

**Supporting Information:**

**A computational modelling framework to quantify the effects of passaging cell lines**

**Wang Jin · Catherine J Penington ·  
Scott W McCue · Matthew J Simpson**

July 13, 2017

**C++ code for cell culture growth**

```
1 #include <cmath>
2 #include <iostream>
3 #include <vector>
4 #include <stdio.h>
5 #include <stdlib.h>
6 #include <fstream>
7 #include <ctime>
8 #include <string>
9 #include <sstream>
10 #include <algorithm>
11 #include <iterator>
12 #include <random>
13
14 using namespace std;
15
16 void migration1 (const int agent_row, const int agent_col,
17                 const int rowN, const int colN, int * migPosition) {
18     migPosition[0] = agent_row;
19     migPosition[1] = agent_col;
20     double P = ((double) rand() / (RANDMAX)); //choose migration
21     directions
22     if ((P < 1.0/6.0) && (agent_row > 0) && (agent_col > 0)) { //Position 1
23         migPosition[0] = migPosition[0] - 1;
24         migPosition[1] = migPosition[1] - 1;}
25     else if ((P >= 1.0/6.0) && (P < 1.0/3.0) && (agent_row > 0) && (
26         agent_col < colN-1)) { //Position 2
27         migPosition[0] = migPosition[0] - 1;}
28     else if ((P >= 1.0/3.0) && (P < 1.0/2.0) && (agent_col < colN-1)) { //
29         Position 3
30         migPosition[1] = migPosition[1] + 1;}
31     else if ((P >= 1.0/2.0) && (P < 2.0/3.0) && (agent_row < rowN-1) && (
32         agent_col < colN-1)) { //Position 4
33         migPosition[0] = migPosition[0] + 1;}
34     else if ((P >= 2.0/3.0) && (P < 5.0/6.0) && (agent_row < rowN-1) && (
35         agent_col > 0)) { //Position 5
36         migPosition[0] = migPosition[0] + 1;
37         migPosition[1] = migPosition[1] - 1;}
38     else if ((P >= 5.0/6.0) && (agent_col > 0)) { //Position 6
39         migPosition[1] = migPosition[1] - 1;}
40 }
```

```

36
37 void migration2 (const int agent_row, const int agent_col,
38                 const int rowN, const int colN, int * migPosition) {
39     migPosition[0] = agent_row;
40     migPosition[1] = agent_col;
41     double P = ((double) rand() / (RAND_MAX)); //choose migration
42     directions
43     if ((P < 1.0/6.0) && (agent_row > 0)) { //Position 1
44         migPosition[0] = migPosition[0] - 1;}
45     else if ((P >= 1.0/6.0) && (P < 1.0/3.0) && (agent_row > 0) && (
46         agent_col < colN-1)) { //Position 2
47         migPosition[0] = migPosition[0] - 1;
48         migPosition[1] = migPosition[1] + 1;}
49     else if ((P >= 1.0/3.0) && (P < 1.0/2.0) && (agent_col < colN-2)) { //
50         Position 3
51         migPosition[1] = migPosition[1] + 1;}
52     else if ((P >= 1.0/2.0) && (P < 2.0/3.0) && (agent_row < rowN-1) && (
53         agent_col < colN-1)) { //Position 4
54         migPosition[0] = migPosition[0] + 1;
55         migPosition[1] = migPosition[1] + 1;}
56     else if ((P >= 2.0/3.0) && (P < 5.0/6.0) && (agent_row < rowN-1)) { //
57         Position 5
58         migPosition[0] = migPosition[0] + 1;}
59     else if ((P >= 5.0/6.0) && (agent_col > 0)) { //Position 6
60         migPosition[1] = migPosition[1] - 1;}
61 }
62
63 void proliferation1 (const int agent_row, const int agent_col,
64                     const int rowN, const int colN, int * proPosition) {
65     proPosition[0] = agent_row;
66     proPosition[1] = agent_col;
67     double P = ((double) rand() / (RAND_MAX)); //choose proliferation
68     directions
69     if ((P < 1.0/6.0) && (agent_row > 0) && (agent_col > 0)) { //Position 1
70         proPosition[0] = proPosition[0] - 1;
71         proPosition[1] = proPosition[1] - 1;}
72     else if ((P >= 1.0/6.0) && (P < 1.0/3.0) && (agent_row > 0) && (
73         agent_col < colN-1)) { //Position 2
74         proPosition[0] = proPosition[0] - 1;}
75     else if ((P >= 1.0/3.0) && (P < 1.0/2.0) && (agent_col < colN-1)) { //
76         Position 3
77         proPosition[1] = proPosition[1] + 1;}

```

```

70     else if ((P >= 1.0/2.0) && (P < 2.0/3.0) && (agent_row < rowN-1) && (
71         agent_col < colN-1)) { //Position 4
72         proPosition[0] = proPosition[0] + 1;}
73     else if ((P >= 2.0/3.0) && (P < 5.0/6.0) && (agent_row < rowN-1) && (
74         agent_col > 0)) { //Position 5
75         proPosition[0] = proPosition[0] + 1;
76         proPosition[1] = proPosition[1] - 1;}
77 }
78
79 void proliferation2 (const int agent_row, const int agent_col,
80                     const int rowN, const int colN, int * proPosition) {
81     proPosition[0] = agent_row;
82     proPosition[1] = agent_col;
83     double P = ((double) rand() / (RAND_MAX)); //choose proliferation
84     directions
85     if ((P < 1.0/6.0) && (agent_row > 0)) { //Position 1
86         proPosition[0] = proPosition[0] - 1;}
87     else if ((P >= 1.0/6.0) && (P < 1.0/3.0) && (agent_row > 0) && (
88         agent_col < colN-1)) { //Position 2
89         proPosition[0] = proPosition[0] - 1;
90         proPosition[1] = proPosition[1] + 1;}
91     else if ((P >= 1.0/3.0) && (P < 1.0/2.0) && (agent_col < colN-2)) { //
92         Position 3
93         proPosition[1] = proPosition[1] + 1;}
94     else if ((P >= 1.0/2.0) && (P < 2.0/3.0) && (agent_row < rowN-1) && (
95         agent_col < colN-1)) { //Position 4
96         proPosition[0] = proPosition[0] + 1;
97         proPosition[1] = proPosition[1] + 1;}
98     else if ((P >= 2.0/3.0) && (P < 5.0/6.0) && (agent_row < rowN-1)) { //
99         Position 5
100         proPosition[0] = proPosition[0] + 1;}
101     else if ((P >= 5.0/6.0) && (agent_col > 0)) { //Position 6
102         proPosition[1] = proPosition[1] - 1;}
103 }
104
105 int CalTotal (const int rowN, const int colN) {
106     int Ntotal;
107     if (rowN % 2 == 0) {
108         Ntotal = rowN * colN - rowN/2;
109     } else {

```

```

105     Ntotal = rowN * colN - (rowN+1)/2;
106 }
107 return Ntotal;
108 }
109
110 int main(int argc, char **argv) {
111     srand(time(NULL)); //random seeds
112     random_device rd;
113     mt19937 generator(rd());
114     //set clock
115     clock_t TIME;
116     TIME = clock();
117
118     //Initialisation
119     int passageI, passageN, t, tau;
120     double Pm, Pp;
121     passageI = 0; //passage index
122     passageN = 30; //max passage number
123     tau = 1; //time step: 1 ~ 1/12h
124     t = 0; //current time
125     const int d = 24; //spacing: 1 ~ 24mm
126     enum {rowN = 3610, colN = 4168}; //full scale
127     //enum {rowN = 362, colN = 418}; //scale ~ 1/10
128     const int Ntotal = CalTotal(rowN, colN);
129     const int Nstart = Ntotal * 0.15; //seeding condition
130     const int Nend = Ntotal * 0.85; //85% confluent
131     static vector<vector<int>> domain(rowN, std::vector<int>(colN)); //
132         simulation domain
133     static vector<vector<double>> domain_Pp(rowN, std::vector<double>(
134         colN)); //Pp
135     //static vector<vector<int>> domain_passage(rowN, std::vector<int>(
136         colN)); //passage
137     //vector<vector<int>> domain_age(rowN, std::vector<int>(colN)); //age
138     //static vector<vector<int>> domain_generation(rowN, std::vector<int
139         >(colN)); //generation
140     Pm = 0.35; //migration probability
141     //default_random_engine generator;
142     normal_distribution<double> distribution(4e-3, 1e-3); //Pp distribution
143     normal_distribution<double> eps1(2e-5, 2e-5); //eps1 distribution
144     normal_distribution<double> eps2(1e-5, 1e-6); //eps2 distribution
145     int passageEff = 0;
146     int ageEff = 0;

```

```

143     double Pd = 1.0;
144     double Pd2 = 0.0;
145     double avePp;
146
147     ofstream file1;
148     ofstream file2;
149     //ofstream file3;
150     //ofstream file4;
151     //ofstream file5;
152     ofstream file6;
153     ofstream file7;
154     //ofstream file8;
155     //ofstream file9;
156     //ofstream file10;
157     ofstream file11;
158     file1.open("domain.csv");
159     file2.open("domain_Pp.csv");
160     //file3.open("domain_passage.csv");
161     //file4.open("domain_age.csv");
162     //file5.open("domain_generation.csv");
163     file6.open("domain2.csv");
164     file7.open("domain2_Pp.csv");
165     //file8.open("domain2_passage.csv");
166     //file9.open("domain2_age.csv");
167     //file10.open("domain2_generation.csv");
168     file11.open("td.csv");
169
170     //Seeding
171     int agent_row, agent_col;
172     for (int i=Nstart; i>0; --i) {
173         agent_row = rand() % rowN;
174         agent_col = rand() % colN;
175         if (((rowN-agent_row) % 2 != 0) && (agent_col == colN-1)) {
176             i = i + 1;
177         } else if (domain[agent_row][agent_col] == 0) {
178             domain[agent_row][agent_col] = 1;
179             domain_Pp[agent_row][agent_col] = distribution(generator);
180             if (domain_Pp[agent_row][agent_col] < 0) {
181                 domain_Pp[agent_row][agent_col] = 0.0;
182             }
183
184         } else {

```

```
185         i = i + 1;
186     }
187 }
188
189 //Count initial cells
190 int agent_N = 0;
191 for (int i=0; i<rowN; ++i) {
192     for (int j=0; j<colN; ++j) {
193         if (domain[i][j] == 1) {
194             agent_N = agent_N + 1;
195         }
196     }
197 }
198 //cout << agent_N;
199
200 //Write to files
201 for (int i=0; i<rowN; ++i) {
202     for (int j=0; j<colN; ++j) {
203         file1 << domain[i][j];
204         file2 << domain_Pp[i][j];
205         //file3 << domain_passage[i][j];
206         //file4 << domain_age[i][j];
207         //file5 << domain_generation[i][j];
208         if (j < colN-1) {
209             file1 << ",_";
210             file2 << ",_";
211             //file3 << ", ";
212             //file4 << ", ";
213             //file5 << ", ";
214         } else {
215             file1 << "\n";
216             file2 << "\n";
217             //file3 << "\n";
218             //file4 << "\n";
219             //file5 << "\n";
220         }
221     }
222 }
223
224 t = t + tau;
225 int migPosition[2], proPosition[2];
226 double P;
```

```

227
228 while (passageI <= passageN) { //check passage number
229     cout << "passage_number_#" << passageI << ",_";
230     int N = agent_N;
231     cout << "N(0)_=" << N << endl;
232
233     //check average Pp
234     avePp = 0;
235     for (int i=0; i<rowN; ++i) {
236         for (int j=0; j<colN; ++j) {
237             if (domain[i][j] == 1) {
238                 avePp = avePp + domain.Pp[i][j];
239             }
240         }
241     }
242     avePp = avePp/N;
243     cout << avePp << endl;
244     while (N < Nend) { //check cell population
245         //Migration
246         for (int i=0; i<N; ++i) {
247             P = ((double) rand() / (RAND.MAX)); //generate a random
                number
248             if (P <= Pm) { //perform migration
249                 //select a random site
250                 int ifGhost = 0;
251                 agent_row = rand() % rowN;
252                 agent_col = rand() % colN;
253                 while ((domain[agent_row][agent_col] != 1) || (ifGhost
                    == 1)) { //select a random site , stop until
                        finding an agent
254                     agent_row = rand() % rowN;
255                     agent_col = rand() % colN;
256                 }
257                 //test ghost node
258                 if (((rowN-agent_row) % 2 != 0) && (agent_col == colN
                    -1)) {
259                     ifGhost = 1;
260                 }
261                 if (ifGhost == 0) {
262                     if ((rowN-agent_row) % 2 == 0) {
263                         migration1(agent_row, agent_col, rowN, colN,
                            migPosition);

```



```
264         if (domain[migPosition[0]][migPosition[1]] ==
265             0) { //if the new site is not taken
266                 domain[agent_row][agent_col] = 0; //delete
267                 the previous site
268                 domain[migPosition[0]][migPosition[1]] =
269                     1; //move to the new site
270                 /*if (domain_Pp[migPosition[0]][
271                     migPosition[1]]!= 0 && domain_passage[
272                     migPosition[0]][migPosition[1]]!= 0 &&
273                     domain_age[migPosition[0]][
274                     migPosition[1]]!= 0 &&
275                     domain_generation[migPosition[0]][
276                     migPosition[1]]!= 0) {
277                     cout << "error mig 1" << endl;
278                 }*/
279                 domain_Pp[migPosition[0]][migPosition[1]]
280                     = domain_Pp[agent_row][agent_col]; //
281                 move the corresponding Pp
282                 //domain_passage[migPosition[0]][
283                     migPosition[1]] = domain_passage[
284                     agent_row][agent_col]; //move the
285                 corresponding passage index
286                 //domain_age[migPosition[0]][migPosition
287                     [1]] = domain_age[agent_row][agent_col
288                     ]; //move the corresponding age
289                 //domain_generation[migPosition[0]][
290                     migPosition[1]] = domain_generation[
291                     agent_row][agent_col]; //move the
292                 corresponding generation
293                 domain_Pp[agent_row][agent_col] = 0.0; //
294                 delete the previous Pp
295                 //domain_passage[agent_row][agent_col] =
296                     0; //delete the previous passage index
297                 //domain_age[agent_row][agent_col] = 0; //
298                 delete the previous age
299                 //domain_generation[agent_row][agent_col]
300                     = 0; //delete the previous generation
301                 /*if (domain_Pp[agent_row][agent_col]!=0
302                     || domain_passage[agent_row][agent_col]
303                     !=0 || domain_age[agent_row][
304                     agent_col]!=0 || domain_generation[
305                     agent_row][agent_col]!=0) {
```

```

279         cout << "error mig 1" << endl;
280     }*/
281     }
282     } else {
283         migration2(agent_row, agent_col, rowN, colN,
284                 migPosition);
285         if (domain[migPosition[0]][migPosition[1]] ==
286             0) { //if the new site is not taken
287             domain[agent_row][agent_col] = 0; //delete
288                 the previous site
289             domain[migPosition[0]][migPosition[1]] =
290                 1; //move to the new site
291             /* if (domain.Pp[migPosition[0]][
292                 migPosition[1]]!= 0 && domain_passage[
293                 migPosition[0]][migPosition[1]]!= 0 &&
294                 domain_age[migPosition[0]][
295                 migPosition[1]]!= 0 &&
296                 domain_generation[migPosition[0]][
297                 migPosition[1]]!= 0) {
298                 cout << "error mig 2" << endl;
299             }*/
300             domain.Pp[migPosition[0]][migPosition[1]]
301                 = domain.Pp[agent_row][agent_col]; //
302                 move the corresponding Pp
303             //domain_passage[migPosition[0]][
304                 migPosition[1]] = domain_passage[
305                 agent_row][agent_col]; ///move the
306                 corresponding passage index
307             //domain_age[migPosition[0]][migPosition
308                 [1]] = domain_age[agent_row][agent_col
309                 ]; //move the corresponding age
310             //domain_generation[migPosition[0]][
311                 migPosition[1]] = domain_generation[
312                 agent_row][agent_col]; //move the
313                 corresponding generation
314             domain.Pp[agent_row][agent_col] = 0.0; //
315                 delete the previous Pp
316             //domain_passage[agent_row][agent_col] =
317                 0; //delete the previous passage index
318             //domain_age[agent_row][agent_col] = 0; //
319                 delete the previous age

```

```

297         //domain_generation[agent_row][agent_col]
           = 0; //delete the previous age
298         /*if (domain_Pp[agent_row][agent_col]!=0
           || domain_passage[agent_row][agent_col]
           !=0 || domain_age[agent_row][
           agent_col]!=0 || domain_generation[
           agent_row][agent_col]!=0) {
299             cout << "error mig 2" << endl;
300         }*/
301     }
302 }
303 } else {
304     i = i - 1;
305 }
306
307 }
308 }
309 //Proliferation
310 for (int i=0; i<N; ++i) {
311     //select a random site
312     int ifGhost = 0;
313     agent_row = rand() % rowN;
314     agent_col = rand() % colN;
315     while ((domain[agent_row][agent_col] != 1) || (ifGhost ==
           1)) { //select a random site, stop until finding an
           agent
316         agent_row = rand() % rowN;
317         agent_col = rand() % colN;
318     }
319     //test ghost node
320     if (((rowN-agent_row) % 2 != 0) && (agent_col == colN-1))
           {
321         ifGhost = 1;
322     }
323     if (ifGhost == 0)
324     {
325         Pp = domain_Pp[agent_row][agent_col];
326         P = ((double) rand() / (RANDMAX)); //generate random
           number
327         if (P <= Pp) {
328             if ((rowN-agent_row) % 2 == 0) {

```

```

329     proliferation1(agent_row, agent_col, rowN,
330                   colN, proPosition);
331     if (domain[proPosition[0]][proPosition[1]] ==
332         0) { //if the new site is not taken
333         domain[proPosition[0]][proPosition[1]] =
334             1; //proliferate at the new site
335         P = ((double) rand() / (RAND_MAX)); //
336             generate a random number
337         if (ageEff && P<=Pd2) { //damage
338             domain_Pp[proPosition[0]][proPosition
339                 [1]] = Pp - max(eps2(generator),
340                               0.0);
341             domain_Pp[proPosition[0]][proPosition
342                 [1]] = max(domain_Pp[proPosition
343                     [0]][proPosition[1]], 0.0);
344             domain_Pp[agent_row][agent_col] =
345                 domain_Pp[proPosition[0]][
346                     proPosition[1]];
347             if (domain_Pp[agent_row][agent_col]<0
348                 || domain_Pp[agent_row][agent_col
349                     ]!=domain_Pp[proPosition[0]][
350                         proPosition[1]]) {
351                 cout << "error" << endl;
352             }
353         } else { //no damage
354             domain_Pp[proPosition[0]][proPosition
355                 [1]] = Pp; //adopt Pp
356         }
357         //domain_passage[proPosition[0]][
358             proPosition[1]] = passageI; //passage
359             number when it was born
360         //domain_age[proPosition[0]][proPosition
361             [1]] = -1; //initiate age = -1 so that
362             when updating cell age it equals 0
363         //domain_generation[proPosition[0]][
364             proPosition[1]] = domain_generation[
365                 agent_row][agent_col] + 1; //add
366             generation
367         //domain_generation[agent_row][agent_col]
368             = domain_generation[agent_row][
369                 agent_col] + 1; //add generation

```

```

347         agent_N = agent_N + 1; //update agent
           population
348     }
349     } else {
350         proliferation2(agent_row, agent_col, rowN,
           colN, proPosition);
351         if (domain[proPosition[0]][proPosition[1]] ==
           0) { //if the new site is not taken
352             domain[proPosition[0]][proPosition[1]] =
           1; //proliferate at the new site
353             P = ((double) rand() / (RAND_MAX)); //
           generate a random number
354             if (ageEff && P <= Pd2) { //damage
355                 domain_Pp[proPosition[0]][proPosition
           [1]] = Pp - max(eps2(generator),
           0.0);
356                 domain_Pp[proPosition[0]][proPosition
           [1]] = max(domain_Pp[proPosition
           [0]][proPosition[1]], 0.0);
357                 domain_Pp[agent_row][agent_col] =
           domain_Pp[proPosition[0]][
           proPosition[1]];
358                 if (domain_Pp[agent_row][agent_col] < 0
           || domain_Pp[agent_row][agent_col
           ] != domain_Pp[proPosition[0]][
           proPosition[1]]) {
359                     cout << "error" << endl;
360                 }
361             } else { //no damage
362                 domain_Pp[proPosition[0]][proPosition
           [1]] = Pp; //adopt Pp
363             }
364             //domain_passage[proPosition[0]][
           proPosition[1]] = passageI; //passage
           number when it was born
365             //domain_age[proPosition[0]][proPosition
           [1]] = -1; //initiate age = -1 so that
           when updating cell age it equals 0
366             //domain_generation[proPosition[0]][
           proPosition[1]] = domain_generation[
           agent_row][agent_col] + 1; //add
           generation

```

```

367         //domain_generation[agent_row][agent_col]
           = domain_generation[agent_row][
           agent_col] + 1; //add generation
368     /*if (passageI!=0)
369     {
370         cout << "Pp = " << Pp << endl;
371     }*/
372     agent_N = agent_N + 1; //update agent
           population
373     }
374     }
375     }
376     } else {
377         i = i - 1;
378     }
379 }
380
381 //update cell age
382 /*for (int i=0; i<rowN; ++i) {
383     for (int j=0; j<colN; ++j) {
384         if (domain[i][j]==1) { //check if there is a cell
385             domain_age[i][j] = domain_age[i][j] + tau;
386         }
387     }
388 }*/
389
390 N = agent_N; //update cell number
391 //cout << "N(" << t << ") = " << N << endl;
392
393 //Write to files
394 if (N >= Nend) {
395     for (int i=0; i<rowN; ++i) {
396         for (int j=0; j<colN; ++j) {
397             file6 << domain[i][j];
398             file7 << domain_Pp[i][j];
399             //file8 << domain_passage[i][j];
400             //file9 << domain_age[i][j];
401             //file10 << domain_generation[i][j];
402             if (j < colN-1) {
403                 file6 << ", ";
404                 file7 << ", ";
405                 //file8 << ", ";

```

```
406         //file9 << ", ";
407         //file10 << ", ";
408     } else {
409         file6 << "\n";
410         file7 << "\n";
411         //file8 << "\n";
412         //file9 << "\n";
413         //file10 << "\n";
414     }
415 }
416 }
417 }
418
419     t = t + tau;
420
421 }
422 //cout << " DONE N = " << agent_N << endl;
423 cout << "DONE_N(" << (t-tau) << ")_=_ " << N << endl;
424 file11 << (t-tau);
425 if (passageI != passageN + 1)
426 {
427     file11 << ",_=";
428 }
429
430 //check average Pp
431 avePp = 0;
432 for (int i=0; i<rowN; ++i) {
433     for (int j=0; j<colN; ++j) {
434         if (domain[i][j] == 1) {
435             avePp = avePp + domain_Pp[i][j];
436         }
437     }
438 }
439 avePp = avePp/N;
440 cout << avePp << endl;
441
442 //Subculturing
443 passageI = passageI + 1; //update passage number
444 t = 0; //reset time
445 if (passageI != passageN + 1) { //check if subculture
446     agent_N = 0; //delete current cell number
447     double * Pp_temp;
```

```

448     //int * passage_temp;
449     //int * generation_temp;
450     Pp_temp = new double [Nstart];
451     //passage_temp = new int [Nstart];
452     //generation_temp = new int [Nstart];
453     //Select cells
454     for (int i=Nstart; i>0; --i) {
455         agent_row = rand() % rowN;
456         agent_col = rand() % colN;
457         if ((rowN-agent_row) % 2 != 0) && (agent_col == colN-1)
458             {
459                 i = i + 1;
460             } else if (domain[agent_row][agent_col] == 1) {
461                 Pp_temp[Nstart-i] = domain_Pp[
462                     agent_row][agent_col];
463                 //passage_temp[Nstart-i] =
464                     domain_passage[agent_row][
465                         agent_col];
466                 //age_temp[Nstart-i] = domain_age[
467                     agent_row][agent_col];
468                 //generation_temp[Nstart-i] =
469                     domain_generation[agent_row][
470                         agent_col];
471             } else {
472                 i = i + 1;
473             }
474     }
475
476     //Delete cells
477     for (int i=0; i<rowN; ++i) {
478         for (int j=0; j<colN; ++j) {
479             if (domain[i][j] == 1) {
480                 domain[i][j] = 0;
481                 domain_Pp[i][j] = 0.0;
482                 //domain_passage[i][j] = 0;
483                 //domain_age[i][j] = 0;
484                 //domain_generation[i][j] = 0;
485             }
486         }
487     }
488
489     //Shuffle & delete temp values

```



```

483         for (int i=Nstart; i>0; --i) {
484             agent_row = rand() % rowN;
485             agent_col = rand() % colN;
486             if (((rowN-agent_row) % 2 != 0) && (
                    agent_col == colN-1)) {
487                 i = i + 1;
488             } else if (domain[agent_row][agent_col] ==
                    0) {
489                 domain[agent_row][agent_col] = 1;
490             P = ((double) rand() / (RANDMAX)); //generate a
                    random number
491             if (passageEff && P<=Pd) { //damage
492                 domain_Pp[agent_row][agent_col] = Pp_temp[Nstart-i
                    ] - max(eps1(generator), 0.0);
493                 //cout << domain_Pp[agent_row][agent_col] << endl;
494                 domain_Pp[agent_row][agent_col] = max(domain_Pp[
                    agent_row][agent_col], 0.0);
495                 if (domain_Pp[agent_row][agent_col] < 0) {
496                     cout << "error" << endl;
497                 }
498             } else { //no damage
499                 domain_Pp[agent_row][agent_col] = Pp_temp[Nstart-i
                    ];
500             }
501             //domain_passage[agent_row][agent_col] = passage_temp[
                    Nstart-i];
502             //domain_age[agent_row][agent_col] = age_temp[Nstart-i
                    ];
503             //domain_generation[agent_row][agent_col] =
                    generation_temp[Nstart-i];
504
505             agent_N = agent_N + 1;
506         } else {
507             i = i + 1;
508         }
509     }
510
511     //Delete arrays
512     delete [] Pp_temp;
513     //delete [] passage_temp;
514     //delete [] generation_temp;
515

```

```

516         //Write to files
517         for (int i=0; i<rowN; ++i) {
518             for (int j=0; j<colN; ++j) {
519                 file1 << domain[i][j];
520                 file2 << domain_Pp[i][j];
521                 //file3 << domain_passage[i][j];
522                 //file4 << domain_age[i][j];
523                 //file5 << domain_generation[i][j];
524                 if (j < colN-1) {
525                     file1 << ",_";
526                     file2 << ",_";
527                     //file3 << ", ";
528                     //file4 << ", ";
529                     //file5 << ", ";
530                 } else {
531                     file1 << "\n";
532                     file2 << "\n";
533                     //file3 << "\n";
534                     //file4 << "\n";
535                     //file5 << "\n";
536                 }
537             }
538         }
539     }
540 }
541
542
543 file1.close();
544 file2.close();
545 //file3.close();
546 //file4.close();
547 //file5.close();
548 file6.close();
549 file7.close();
550 //file8.close();
551 //file9.close();
552 //file10.close();
553 file11.close();
554
555 TIME = clock() - TIME;
556 cout << "It_takes_" << (float)TIME/CLOCKS_PER_SEC << "_second(s)." <<
    endl;

```

---

```
557     cin.get();  
558     return 0;  
559 }
```

## C++ code for scratch assays

```

1  #include <cmath>
2  #include <iostream>
3  #include <vector>
4  #include <stdio.h>
5  #include <stdlib.h>
6  #include <fstream>
7  #include <ctime>
8  #include <string>
9  #include <sstream>
10 #include <algorithm>
11 #include <iterator>
12 #include <random>
13
14 using namespace std;
15
16 void migration1 (const int agent_row, const int agent_col,
17                 const int rowN, const int colN, int * migPosition) {
18     migPosition[0] = agent_row;
19     migPosition[1] = agent_col;
20     double P = ((double) rand() / (RANDMAX)); //choose migration
           directions
21     if ((P < 1.0/6.0) && (agent_row > 0) && (agent_col > 0)) { //Position 1
22         migPosition[0] = migPosition[0] - 1;
23         migPosition[1] = migPosition[1] - 1;}
24     else if ((P >= 1.0/6.0) && (P < 1.0/3.0) && (agent_row > 0) && (
           agent_col < colN-1)) { //Position 2
25         migPosition[0] = migPosition[0] - 1;}
26     else if ((P >= 1.0/3.0) && (P < 1.0/2.0) && (agent_col < colN-1)) { //
           Position 3
27         migPosition[1] = migPosition[1] + 1;}
28     else if ((P >= 1.0/2.0) && (P < 2.0/3.0) && (agent_row < rowN-1) && (
           agent_col < colN-1)) { //Position 4
29         migPosition[0] = migPosition[0] + 1;}
30     else if ((P >= 2.0/3.0) && (P < 5.0/6.0) && (agent_row < rowN-1) && (
           agent_col > 0)) { //Position 5
31         migPosition[0] = migPosition[0] + 1;
32         migPosition[1] = migPosition[1] - 1;}
33     else if ((P >= 5.0/6.0) && (agent_col > 0)) { //Position 6
34         migPosition[1] = migPosition[1] - 1;}
35 }

```

```

36
37 void migration2 (const int agent_row, const int agent_col,
38                 const int rowN, const int colN, int * migPosition) {
39     migPosition[0] = agent_row;
40     migPosition[1] = agent_col;
41     double P = ((double) rand() / (RAND_MAX)); //choose migration
42     directions
43     if ((P < 1.0/6.0) && (agent_row > 0)) { //Position 1
44         migPosition[0] = migPosition[0] - 1;}
45     else if ((P >= 1.0/6.0) && (P < 1.0/3.0) && (agent_row > 0) && (
46         agent_col < colN-1)) { //Position 2
47         migPosition[0] = migPosition[0] - 1;
48         migPosition[1] = migPosition[1] + 1;}
49     else if ((P >= 1.0/3.0) && (P < 1.0/2.0) && (agent_col < colN-2)) { //
50         Position 3
51         migPosition[1] = migPosition[1] + 1;}
52     else if ((P >= 1.0/2.0) && (P < 2.0/3.0) && (agent_row < rowN-1) && (
53         agent_col < colN-1)) { //Position 4
54         migPosition[0] = migPosition[0] + 1;
55         migPosition[1] = migPosition[1] + 1;}
56     else if ((P >= 2.0/3.0) && (P < 5.0/6.0) && (agent_row < rowN-1)) { //
57         Position 5
58         migPosition[0] = migPosition[0] + 1;}
59     else if ((P >= 5.0/6.0) && (agent_col > 0)) { //Position 6
60         migPosition[1] = migPosition[1] - 1;}
61 }
62
63 void proliferation1 (const int agent_row, const int agent_col,
64                     const int rowN, const int colN, int * proPosition) {
65     proPosition[0] = agent_row;
66     proPosition[1] = agent_col;
67     double P = ((double) rand() / (RAND_MAX)); //choose migration
68     directions
69     if ((P < 1.0/6.0) && (agent_row > 0) && (agent_col > 0)) { //Position 1
70         proPosition[0] = proPosition[0] - 1;
71         proPosition[1] = proPosition[1] - 1;}
72     else if ((P >= 1.0/6.0) && (P < 1.0/3.0) && (agent_row > 0) && (
73         agent_col < colN-1)) { //Position 2
74         proPosition[0] = proPosition[0] - 1;}
75     else if ((P >= 1.0/3.0) && (P < 1.0/2.0) && (agent_col < colN-1)) { //
76         Position 3
77         proPosition[1] = proPosition[1] + 1;}

```

```

70     else if ((P >= 1.0/2.0) && (P < 2.0/3.0) && (agent_row < rowN-1) && (
71         agent_col < colN-1)) { //Position 4
72         proPosition[0] = proPosition[0] + 1;}
73     else if ((P >= 2.0/3.0) && (P < 5.0/6.0) && (agent_row < rowN-1) && (
74         agent_col > 0)) { //Position 5
75         proPosition[0] = proPosition[0] + 1;
76         proPosition[1] = proPosition[1] - 1;}
77 }
78
79 void proliferation2 (const int agent_row, const int agent_col,
80                     const int rowN, const int colN, int * proPosition) {
81     proPosition[0] = agent_row;
82     proPosition[1] = agent_col;
83     double P = ((double) rand() / (RANDMAX)); //choose migration
84     directions
85     if ((P < 1.0/6.0) && (agent_row > 0)) { //Position 1
86         proPosition[0] = proPosition[0] - 1;}
87     else if ((P >= 1.0/6.0) && (P < 1.0/3.0) && (agent_row > 0) && (
88         agent_col < colN-1)) { //Position 2
89         proPosition[0] = proPosition[0] - 1;
90         proPosition[1] = proPosition[1] + 1;}
91     else if ((P >= 1.0/3.0) && (P < 1.0/2.0) && (agent_col < colN-2)) { //
92         Position 3
93         proPosition[1] = proPosition[1] + 1;}
94     else if ((P >= 1.0/2.0) && (P < 2.0/3.0) && (agent_row < rowN-1) && (
95         agent_col < colN-1)) { //Position 4
96         proPosition[0] = proPosition[0] + 1;
97         proPosition[1] = proPosition[1] + 1;}
98     else if ((P >= 2.0/3.0) && (P < 5.0/6.0) && (agent_row < rowN-1)) { //
99         Position 5
100         proPosition[0] = proPosition[0] + 1;}
101     else if ((P >= 5.0/6.0) && (agent_col > 0)) { //Position 6
102         proPosition[1] = proPosition[1] - 1;}
103 }
104
105 int CalTotal (const int rowN, const int colN) {
106     int Ntotal;
107     if (rowN % 2 == 0) {
108         Ntotal = rowN * colN - rowN/2;
109     } else {

```

```

105     Ntotal = rowN * colN - (rowN+1)/2;
106 }
107 return Ntotal;
108 }
109
110 void importdata (const int N, double * dataPp) {
111     ifstream ifs ("Pp.csv");
112     char dummy;
113     for (int i = 0; i < N; ++i){
114         ifs >> dataPp[i];
115         if (i < (N - 1))
116             ifs >> dummy;
117     }
118 }
119
120 int main(int argc, char **argv) {
121     srand(time(NULL)); //random seeds
122     random_device rd;
123     mt19937 generator(rd());
124     //set clock
125     clock_t TIME;
126     TIME = clock();
127
128     //Initialisation
129     int simuNum, sampleNum, t, T, tau, agent_row, agent_col, migPosition
        [2], proPosition[2];
130     double Pm, Pp, P, avePp;
131     simuNum = 1; //simulation index
132     sampleNum = 2; //total simulations
133     tau = 1; //time step: 1 ~ 1/12h
134     t = 0; //current time
135     T = 864; //end time
136     Pm = 0.35;
137     const int d = 24; //spacing: 1 ~ 24mm
138     enum {rowN = 68, colN = 80}; //1400mm by 1900 mm
139     enum {sCol1 = 29, sCol2 = 51}; //scratch width
140     const int Ntotal = CalTotal(rowN,colN);
141     const int Nstart = Ntotal * 0.3; //seeding condition
142     cout << "Ntotal=__" << Ntotal << endl;
143     cout << "Nseed=__" << Nstart << endl;
144     static vector<vector<int>> domain(rowN, std::vector<int>(colN)); //
        simulation domain

```

```

145     static vector<vector<double>> domain_Pp(rowN, std::vector<double>(
146         colN)); //Pp
147
148     ofstream file1;
149     ofstream file2;
150     ofstream file3;
151     ofstream file4;
152     ofstream file5;
153     file1.open("domain0.csv");
154     file2.open("domain24.csv");
155     file3.open("domain48.csv");
156     file4.open("domain72.csv");
157     file5.open("domain96.csv");
158
159     //Import data
160     int size_data = 12790529; //size of import data
161     double * dataPp;
162     dataPp = new double [size_data];
163     importdata(size_data, dataPp);
164
165     //Seeding
166     for (int i = Nstart; i > 0; --i) {
167         agent_row = rand() % rowN;
168         agent_col = rand() % colN;
169         if (((rowN-agent_row) % 2 != 0) && (agent_col == colN-1)) {
170             i = i + 1;
171         } else if (domain[agent_row][agent_col] == 0) {
172             int randPp = rand() % size_data;
173             domain[agent_row][agent_col] = 1;
174             domain_Pp[agent_row][agent_col] = dataPp[randPp];
175         } else {
176             i = i + 1;
177         }
178     }
179     delete [] dataPp;
180
181     //Scratch
182     for (int i=0; i<rowN; ++i) {
183         if ((rowN-agent_row) % 2 == 0) {
184             for (int j=sCol1; j<=sCol2; ++j) {
185                 domain[i][j] = 0;
186                 domain_Pp[i][j] = 0.0;
187             }
188         }
189     }

```



```
186     } else {
187         for (int j=sCol1; j<=sCol2-1; ++j) {
188             domain[i][j] = 0;
189             domain_Pp[i][j] = 0.0;
190         }
191     }
192 }
193
194 //Count initial cells
195 int agent_N = 0;
196 avePp = 0.0;
197 for (int i=0; i<rowN; ++i) {
198     for (int j=0; j<colN; ++j) {
199         if (domain[i][j] == 1) {
200             agent_N = agent_N + 1;
201             avePp = avePp + domain_Pp[i][j];
202         }
203     }
204 }
205 avePp = avePp / (double)agent_N;
206
207 //Write to files
208 for (int i=0; i<rowN; ++i) {
209     for (int j=0; j<colN; ++j) {
210         file1 << domain[i][j];
211         //file2 << domain_Pp[i][j];
212         if (j < colN-1) {
213             file1 << ",_";
214             //file2 << ", ";
215         } else {
216             file1 << "\n";
217             //file2 << "\n";
218         }
219     }
220 }
221
222 t = t + tau;
223 int timestop = T / t;
224
225 while (simuNum <= sampleNum) {
226     cout << "SimuNum_" << simuNum << ",_";
```



```
256         migration2(agent_row, agent_col, rowN, colN,
257                    migPosition);
258         if (domain[migPosition[0]][migPosition[1]] ==
259             0) { //if the new site is not taken
260             domain[agent_row][agent_col] = 0; //delete
261                 the previous site
262             domain[migPosition[0]][migPosition[1]] =
263                 1; //move to the new site
264             domain_Pp[migPosition[0]][migPosition[1]]
265                 = domain_Pp[agent_row][agent_col]; //
266                 move the corresponding Pp
267             domain_Pp[agent_row][agent_col] = 0.0; //
268                 delete the previous Pp
269         }
270     }
271     } else {
272         i = i - 1;
273     }
274 }
275 }
276 //Proliferation
277 for (int i=0; i<N; ++i) {
278     //select a random site
279     int ifGhost = 0;
280     agent_row = rand() % rowN;
281     agent_col = rand() % colN;
282     while ((domain[agent_row][agent_col] != 1) || (ifGhost ==
283         1)) { //select a random site, stop until finding an
284         agent
285         agent_row = rand() % rowN;
286         agent_col = rand() % colN;
287     }
288     //test ghost node
289     if (((rowN-agent_row) % 2 != 0) && (agent_col == colN-1))
290     {
291         ifGhost = 1;
292     }
293     if (ifGhost == 0) {
294         Pp = domain_Pp[agent_row][agent_col];
295         P = ((double) rand() / (RANDMAX)); //generate a
296             random number
297         if (P <= Pp) {
```

```

287         if ((rowN-agent_row) % 2 == 0) {
288             proliferation1(agent_row, agent_col, rowN,
                colN, proPosition);
289             if (domain[proPosition[0]][proPosition[1]] ==
                0) { //if the new site is not taken
290                 domain[proPosition[0]][proPosition[1]] =
                1; //proliferate at the new site
291                 domain_Pp[proPosition[0]][proPosition[1]]
                = Pp; //adopt Pp
292                 agent_N = agent_N + 1; //update agent
                population
293             }
294         } else {
295             proliferation2(agent_row, agent_col, rowN,
                colN, proPosition);
296             if (domain[proPosition[0]][proPosition[1]] ==
                0) { //if the new site is not taken
297                 domain[proPosition[0]][proPosition[1]] =
                1; //proliferate at the new site
298                 domain_Pp[proPosition[0]][proPosition[1]]
                = Pp; //adopt Pp
299                 agent_N = agent_N + 1; //update agent
                population
300             }
301         }
302     }
303     } else {
304         i = i - 1;
305     }
306 }
307 //Write to files
308 if (t == 288) { //24h
309     for (int i=0; i<rowN; ++i) {
310         for (int j=0; j<colN; ++j) {
311             file2 << domain[i][j];
312             if (j < colN-1) {
313                 file2 << ",_";
314             } else {
315                 file2 << "\n";
316             }
317         }
318     }

```

```
319     }
320     if (t == 576) { //48h
321         for (int i=0; i<rowN; ++i) {
322             for (int j=0; j<colN; ++j) {
323                 file3 << domain[i][j];
324                 if (j < colN-1) {
325                     file3 << ", ";
326                 } else {
327                     file3 << "\n";
328                 }
329             }
330         }
331     }
332     if (t == 864) { //72h
333         for (int i=0; i<rowN; ++i) {
334             for (int j=0; j<colN; ++j) {
335                 file4 << domain[i][j];
336                 if (j < colN-1) {
337                     file4 << ", ";
338                 } else {
339                     file4 << "\n";
340                 }
341             }
342         }
343     }
344     /*if (t == 1152) { //96h
345         for (int i=0; i<rowN; ++i) {
346             for (int j=0; j<colN; ++j) {
347                 file5 << domain[i][j];
348                 if (j < colN-1) {
349                     file5 << ", ";
350                 } else {
351                     file5 << "\n";
352                 }
353             }
354         }
355     }*/
356     t = t + tau; //forward time
357 }
358
359 cout << "DONE_N_=" << agent_N << endl;
360 simuNum = simuNum + 1; //update the simulation index
```

```

361     t = 0; //reset time
362
363     if (simuNum != sampleNum+1) {
364         for (int i=0; i<rowN; ++i) {
365             for (int j=0; j<colN; ++j) {
366                 domain[i][j] = 0;
367                 domain_Pp[i][j] = 0.0;
368             }
369         }
370         //Import data
371         double * dataPp;
372         dataPp = new double [size_data];
373         importdata(size_data , dataPp);
374         //Re-seed cells
375         for (int i = Nstart; i > 0; --i) {
376             agent_row = rand() % rowN;
377             agent_col = rand() % colN;
378             if (((rowN-agent_row) % 2 != 0) && (agent_col ==
379                 colN-1)) {
380                 i = i + 1;
381             } else if (domain[agent_row][agent_col] == 0) {
382                 int randPp = rand() % size_data;
383                 domain[agent_row][agent_col] = 1;
384                 domain_Pp[agent_row][agent_col] = dataPp[randPp];
385             } else {
386                 i = i + 1;
387             }
388         }
389         delete [] dataPp;
390         //Scratch
391         for (int i=0; i<rowN; ++i) {
392             if ((rowN-agent_row) % 2 == 0) {
393                 for (int j=sCol1; j<=sCol2; ++j) {
394                     domain[i][j] = 0;
395                     domain_Pp[i][j] = 0.0;
396                 }
397             } else {
398                 for (int j=sCol1; j<=sCol2-1; ++j) {
399                     domain[i][j] = 0;
400                     domain_Pp[i][j] = 0.0;
401                 }

```

```
402     }
403     //Count cells
404     agent_N = 0;
405     avePp = 0.0;
406     for (int i=0; i<rowN; ++i) {
407         for (int j=0; j<colN; ++j) {
408             if (domain[i][j] == 1) {
409                 agent_N = agent_N + 1;
410                 avePp = avePp + domain_Pp[i][j];
411             }
412         }
413     }
414     avePp = avePp / (double)agent_N;
415     //Write to files
416     for (int i=0; i<rowN; ++i) {
417         for (int j=0; j<colN; ++j) {
418             file1 << domain[i][j];
419             if (j < colN-1) {
420                 file1 << ", ";
421             } else {
422                 file1 << "\n";
423             }
424         }
425     }
426     t = t + tau;
427 }
428 }
429
430 file1.close();
431 file2.close();
432 file3.close();
433 file4.close();
434 file5.close();
435 TIME = clock() - TIME;
436 cout << "It takes_" << (float)TIME/CLOCKS_PER_SEC << "_second(s)." <<
    endl;
437 cin.get();
438 return 0;
439 }
```
